# Supplementary material
Source: publisher figshare collection journal article supplement (https://tandf.figshare.com/ndownloader/files/17774588)
Supplement: Supplementary file 1 [file 17774588]

**Supplementary Material**

Synthesis, spectral characterization, DFT and molecular docking studies of metal(II) complexes derived from thiophene-2-carboxaldehyde and 2‑amino‑6-picoline

LIJI JOHN, R. SELWIN JOSEYPHUS* and I. HUBERT JOE


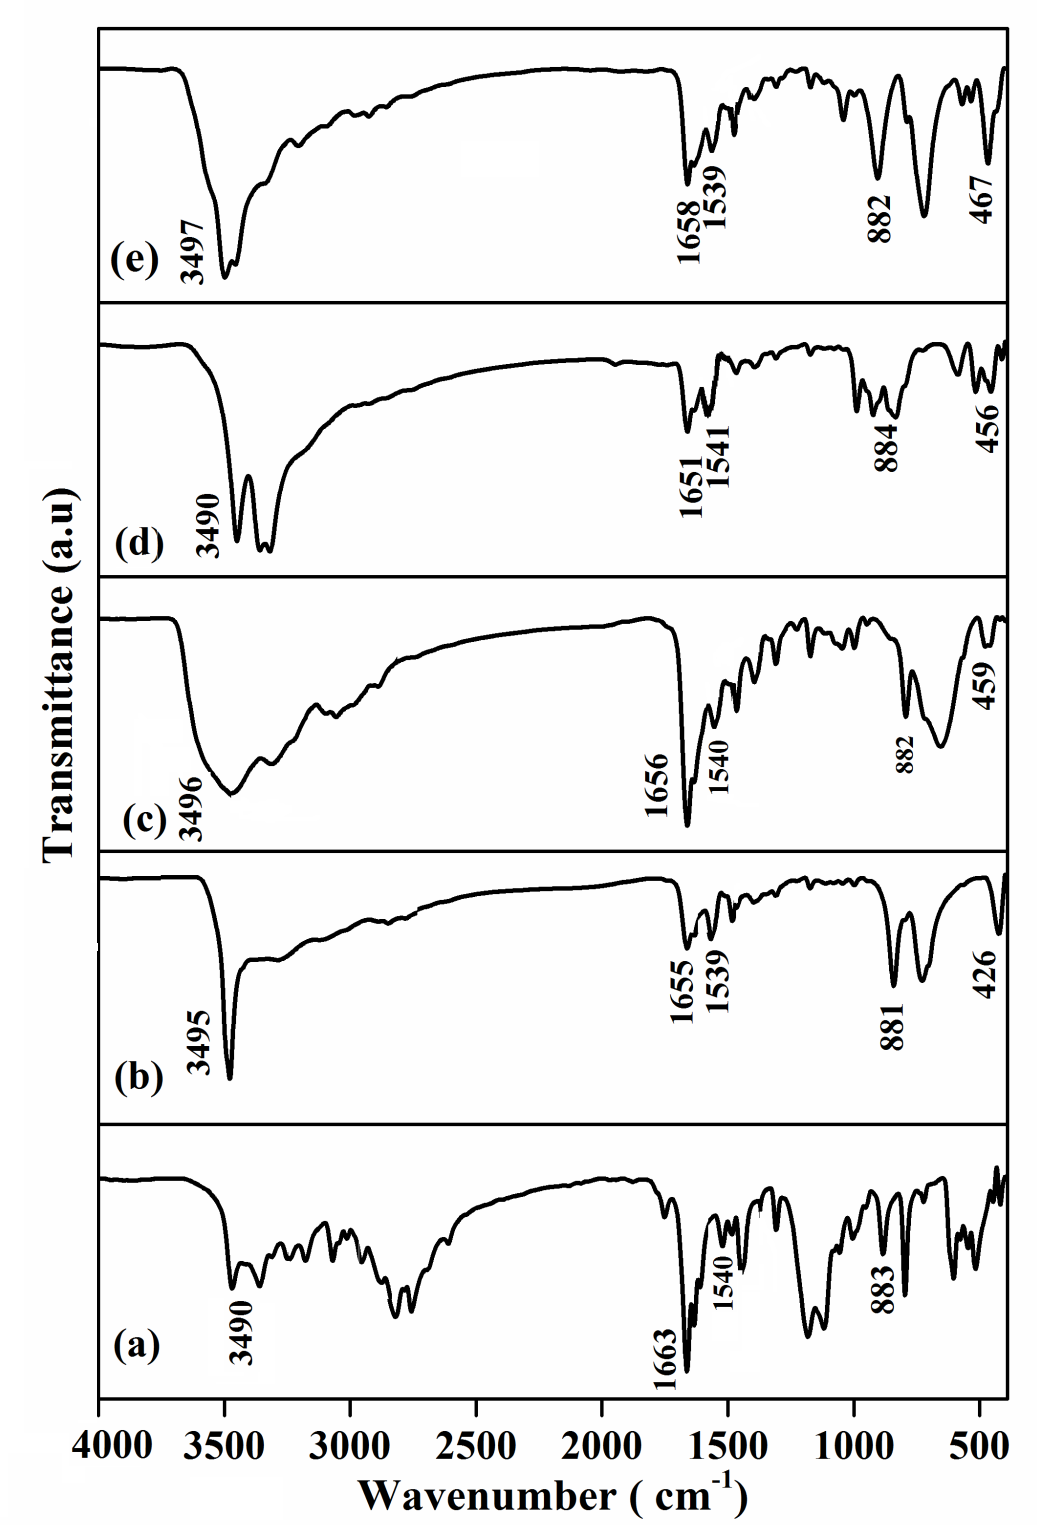


Figure S1. IR spectra of (a) ligand, (b) CoL2Cl2, (c) NiL2Cl2, (d) CuL2Cl2 and (e) ZnL2Cl2.


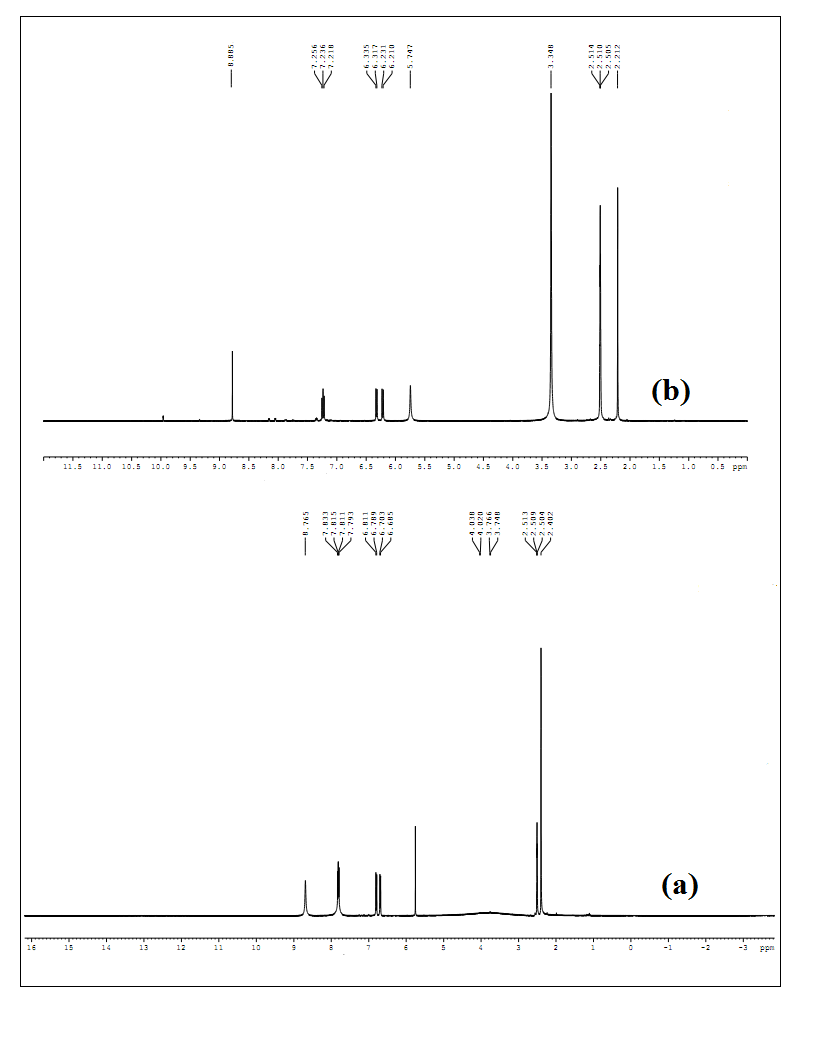


Figure S2. 1H NMR spectrum of (a) ligand and (b) ZnL2Cl2.


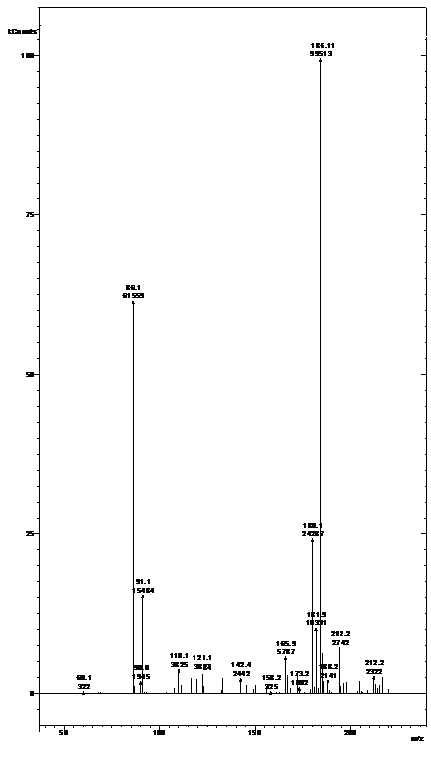


Figure S3. Mass spectrum of ligand.


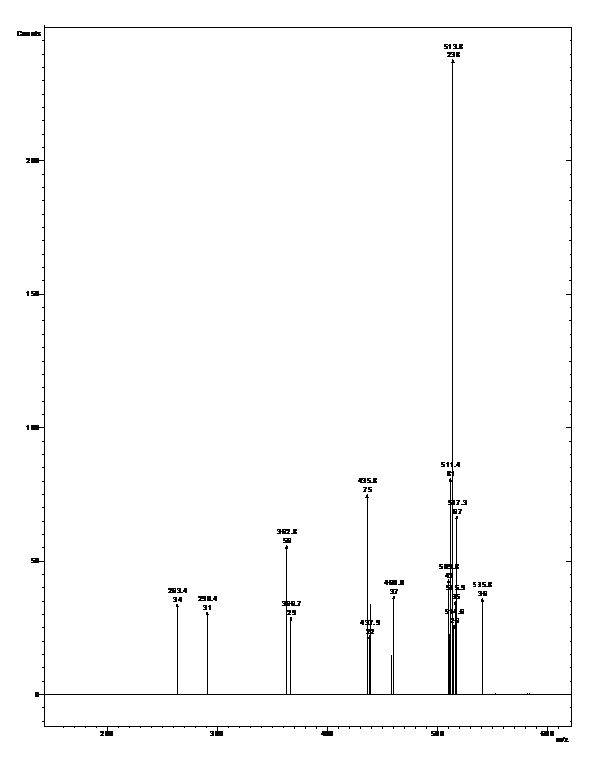


Figure S4. Mass spectrum of CoL2Cl2.


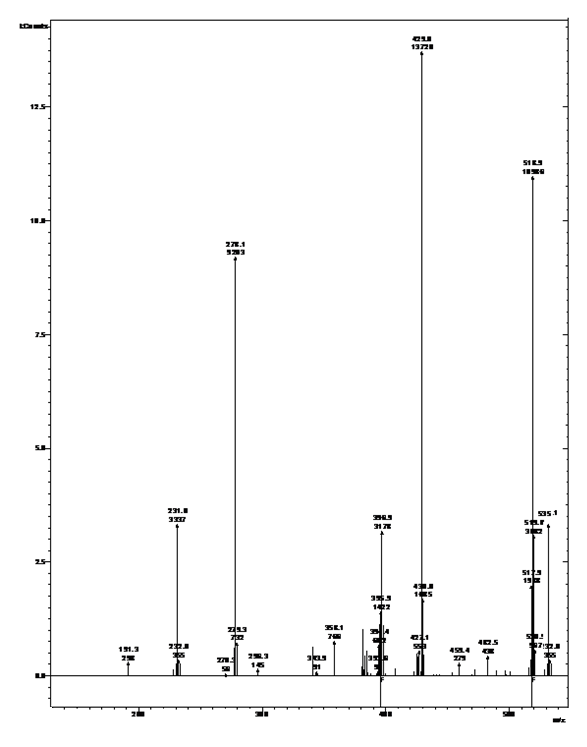


Figure S5. Mass spectrum of NiL2Cl2.


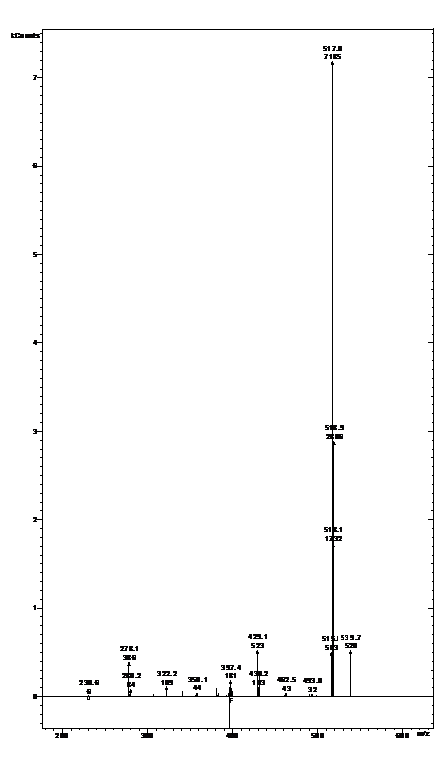


Figure S6. Mass spectrum of CuL2Cl2.


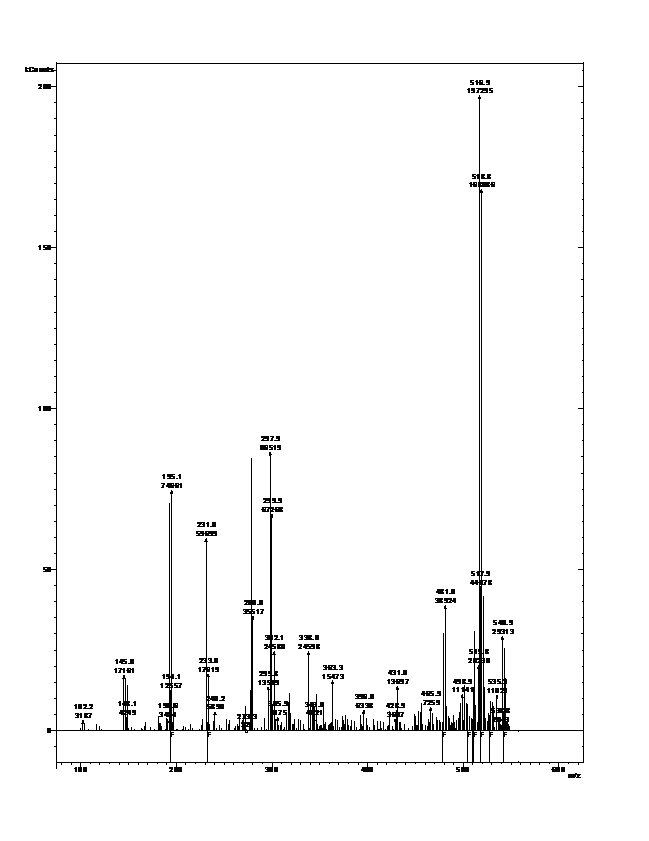


Figure S7. Mass spectrum of ZnL2Cl2.


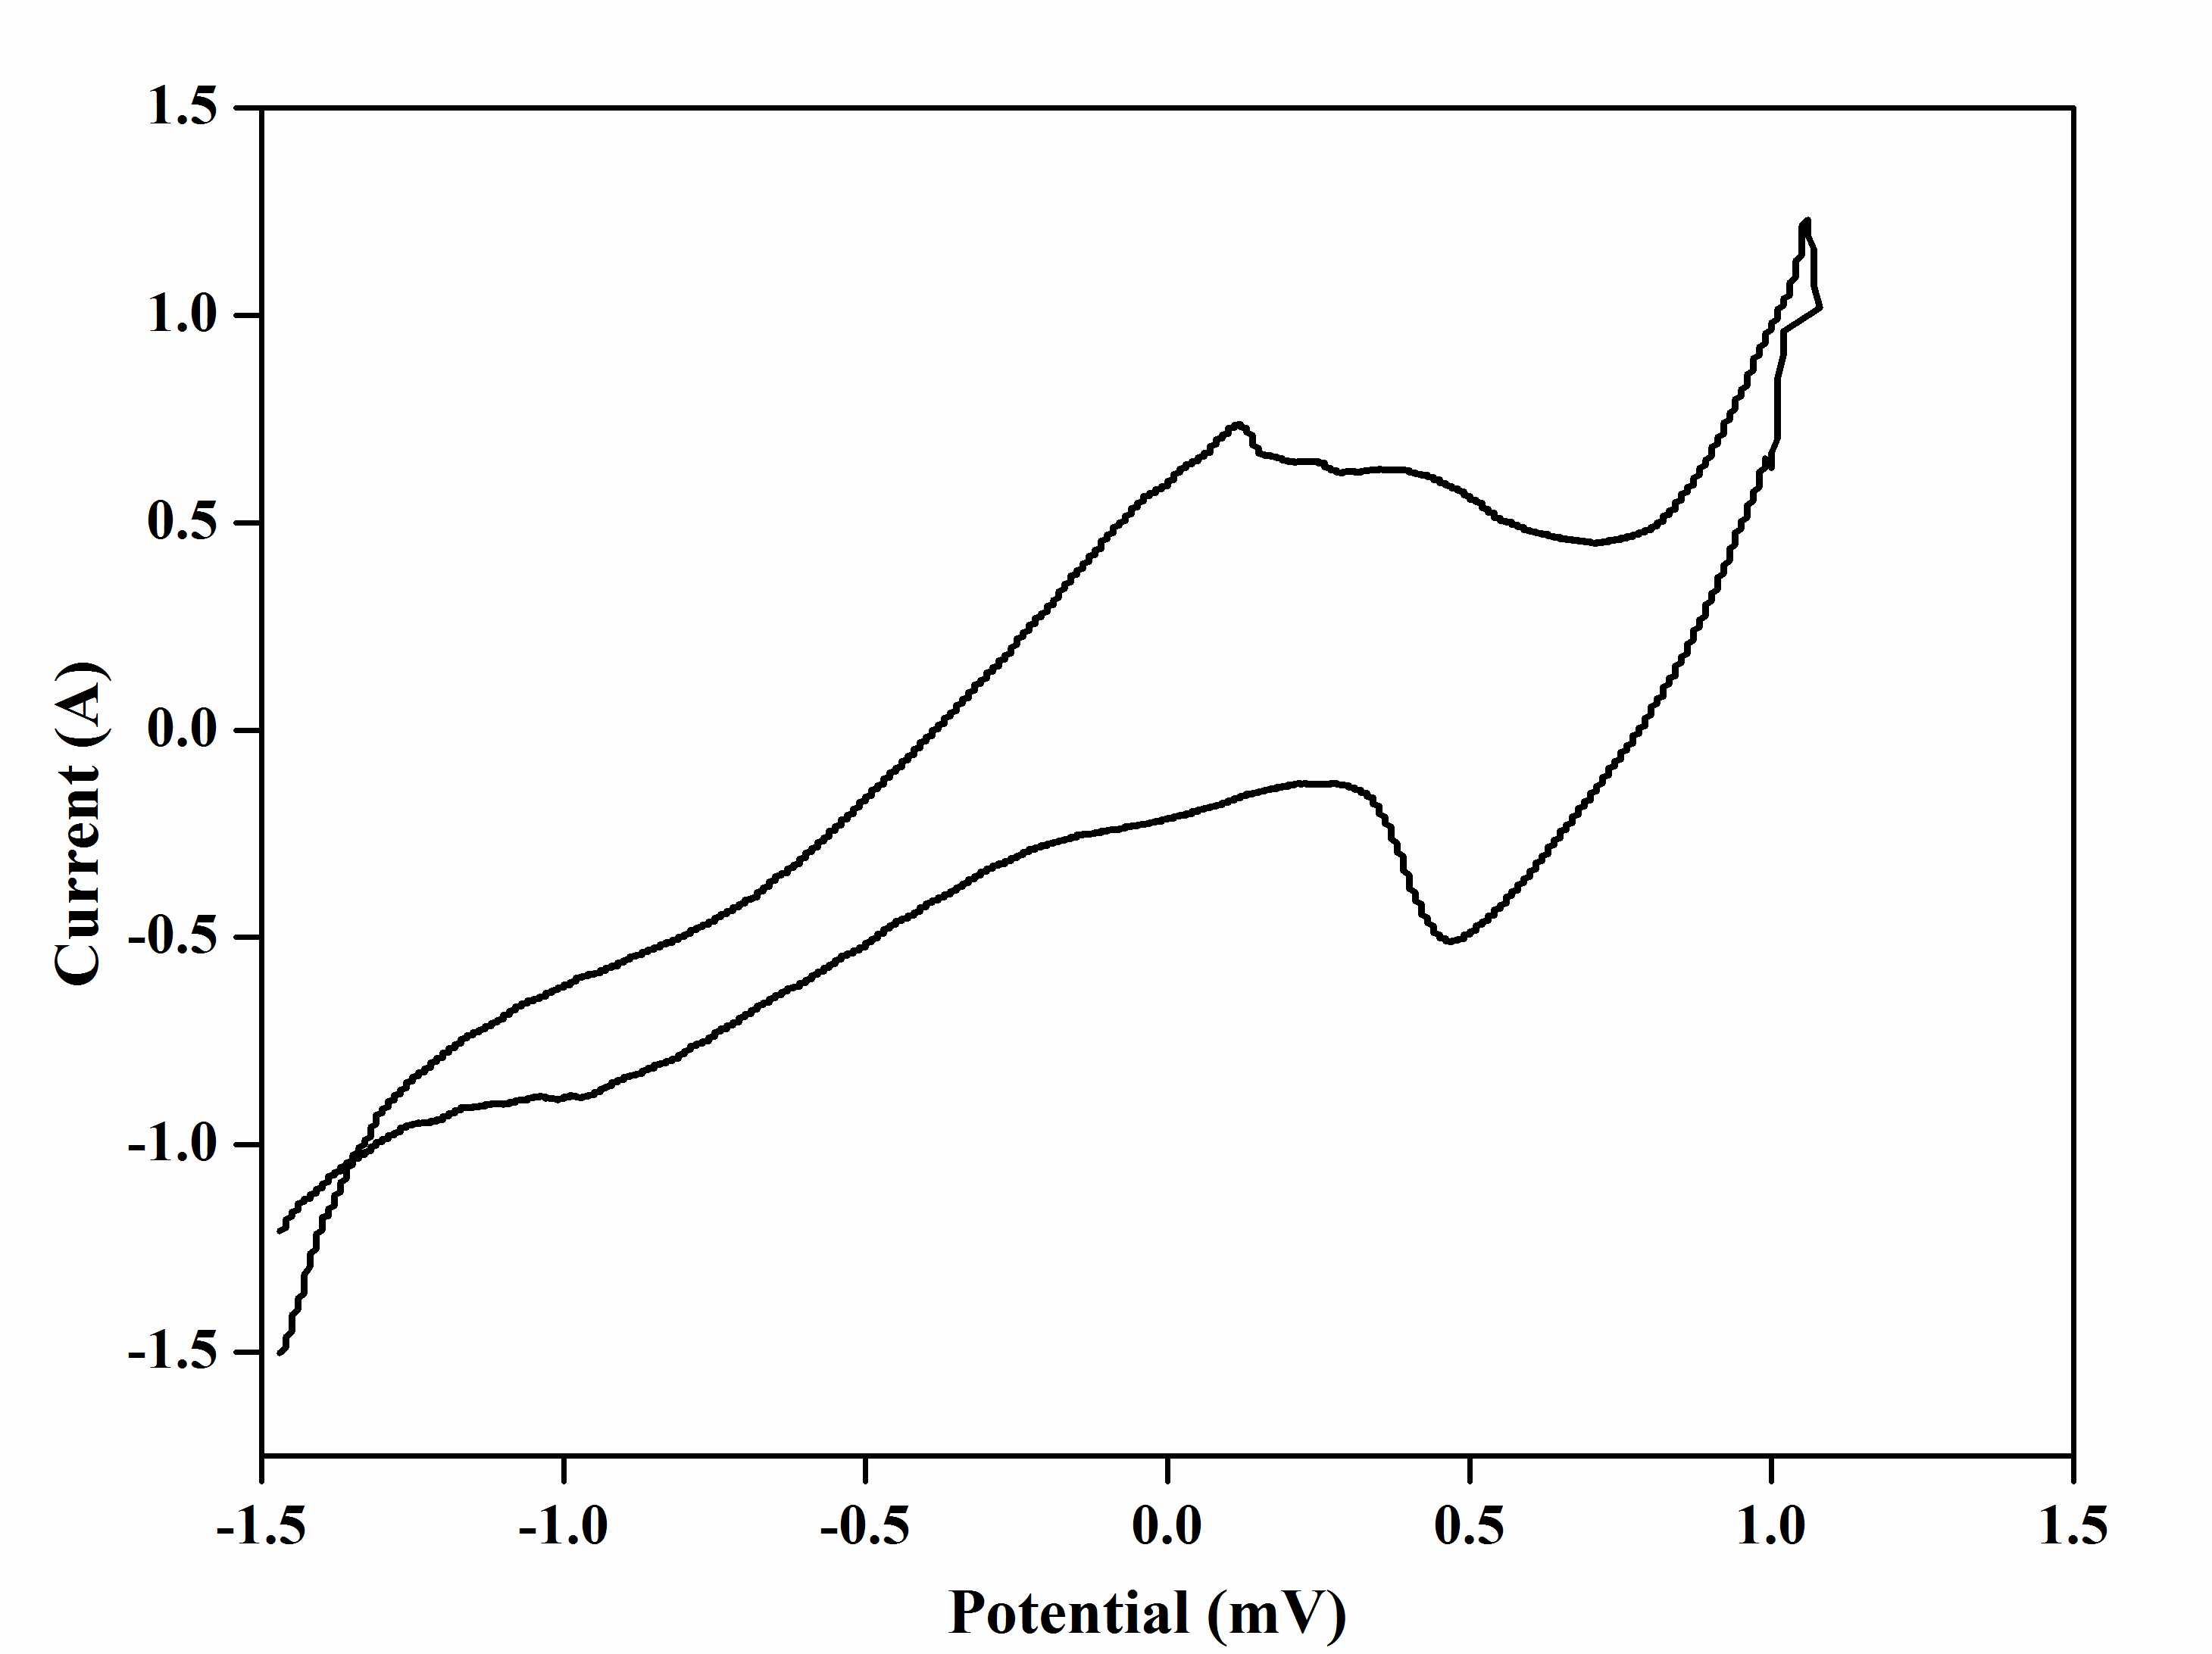


Figure S8. Cyclic voltammogram of CuL2Cl2.


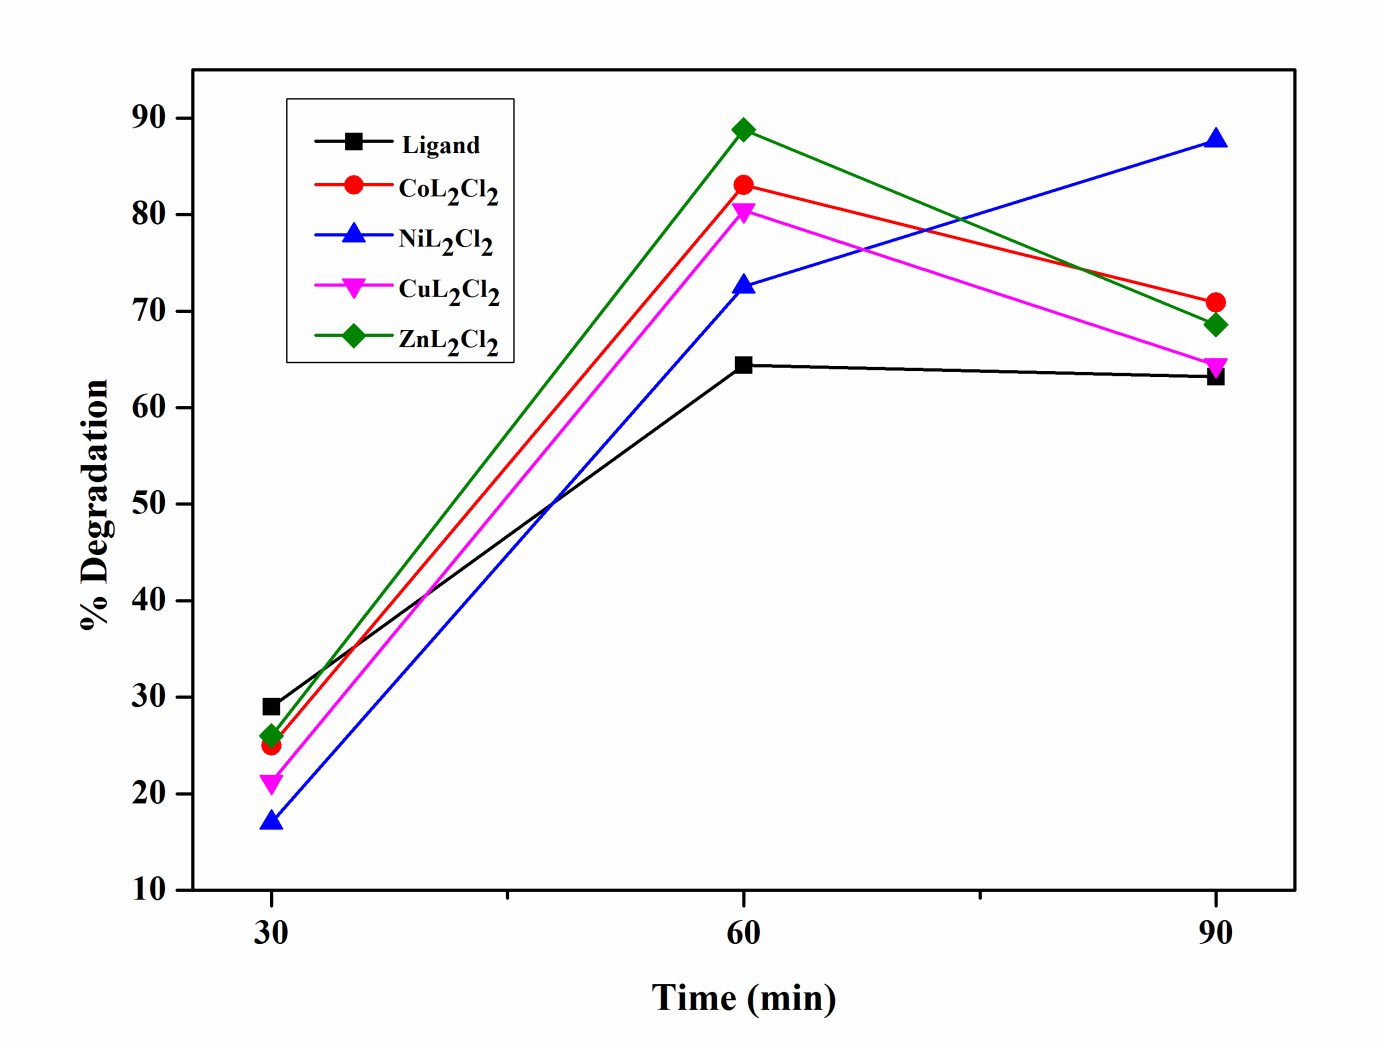


Figure S9. Percentage degradation of MB with time for ligand and metal complexes.


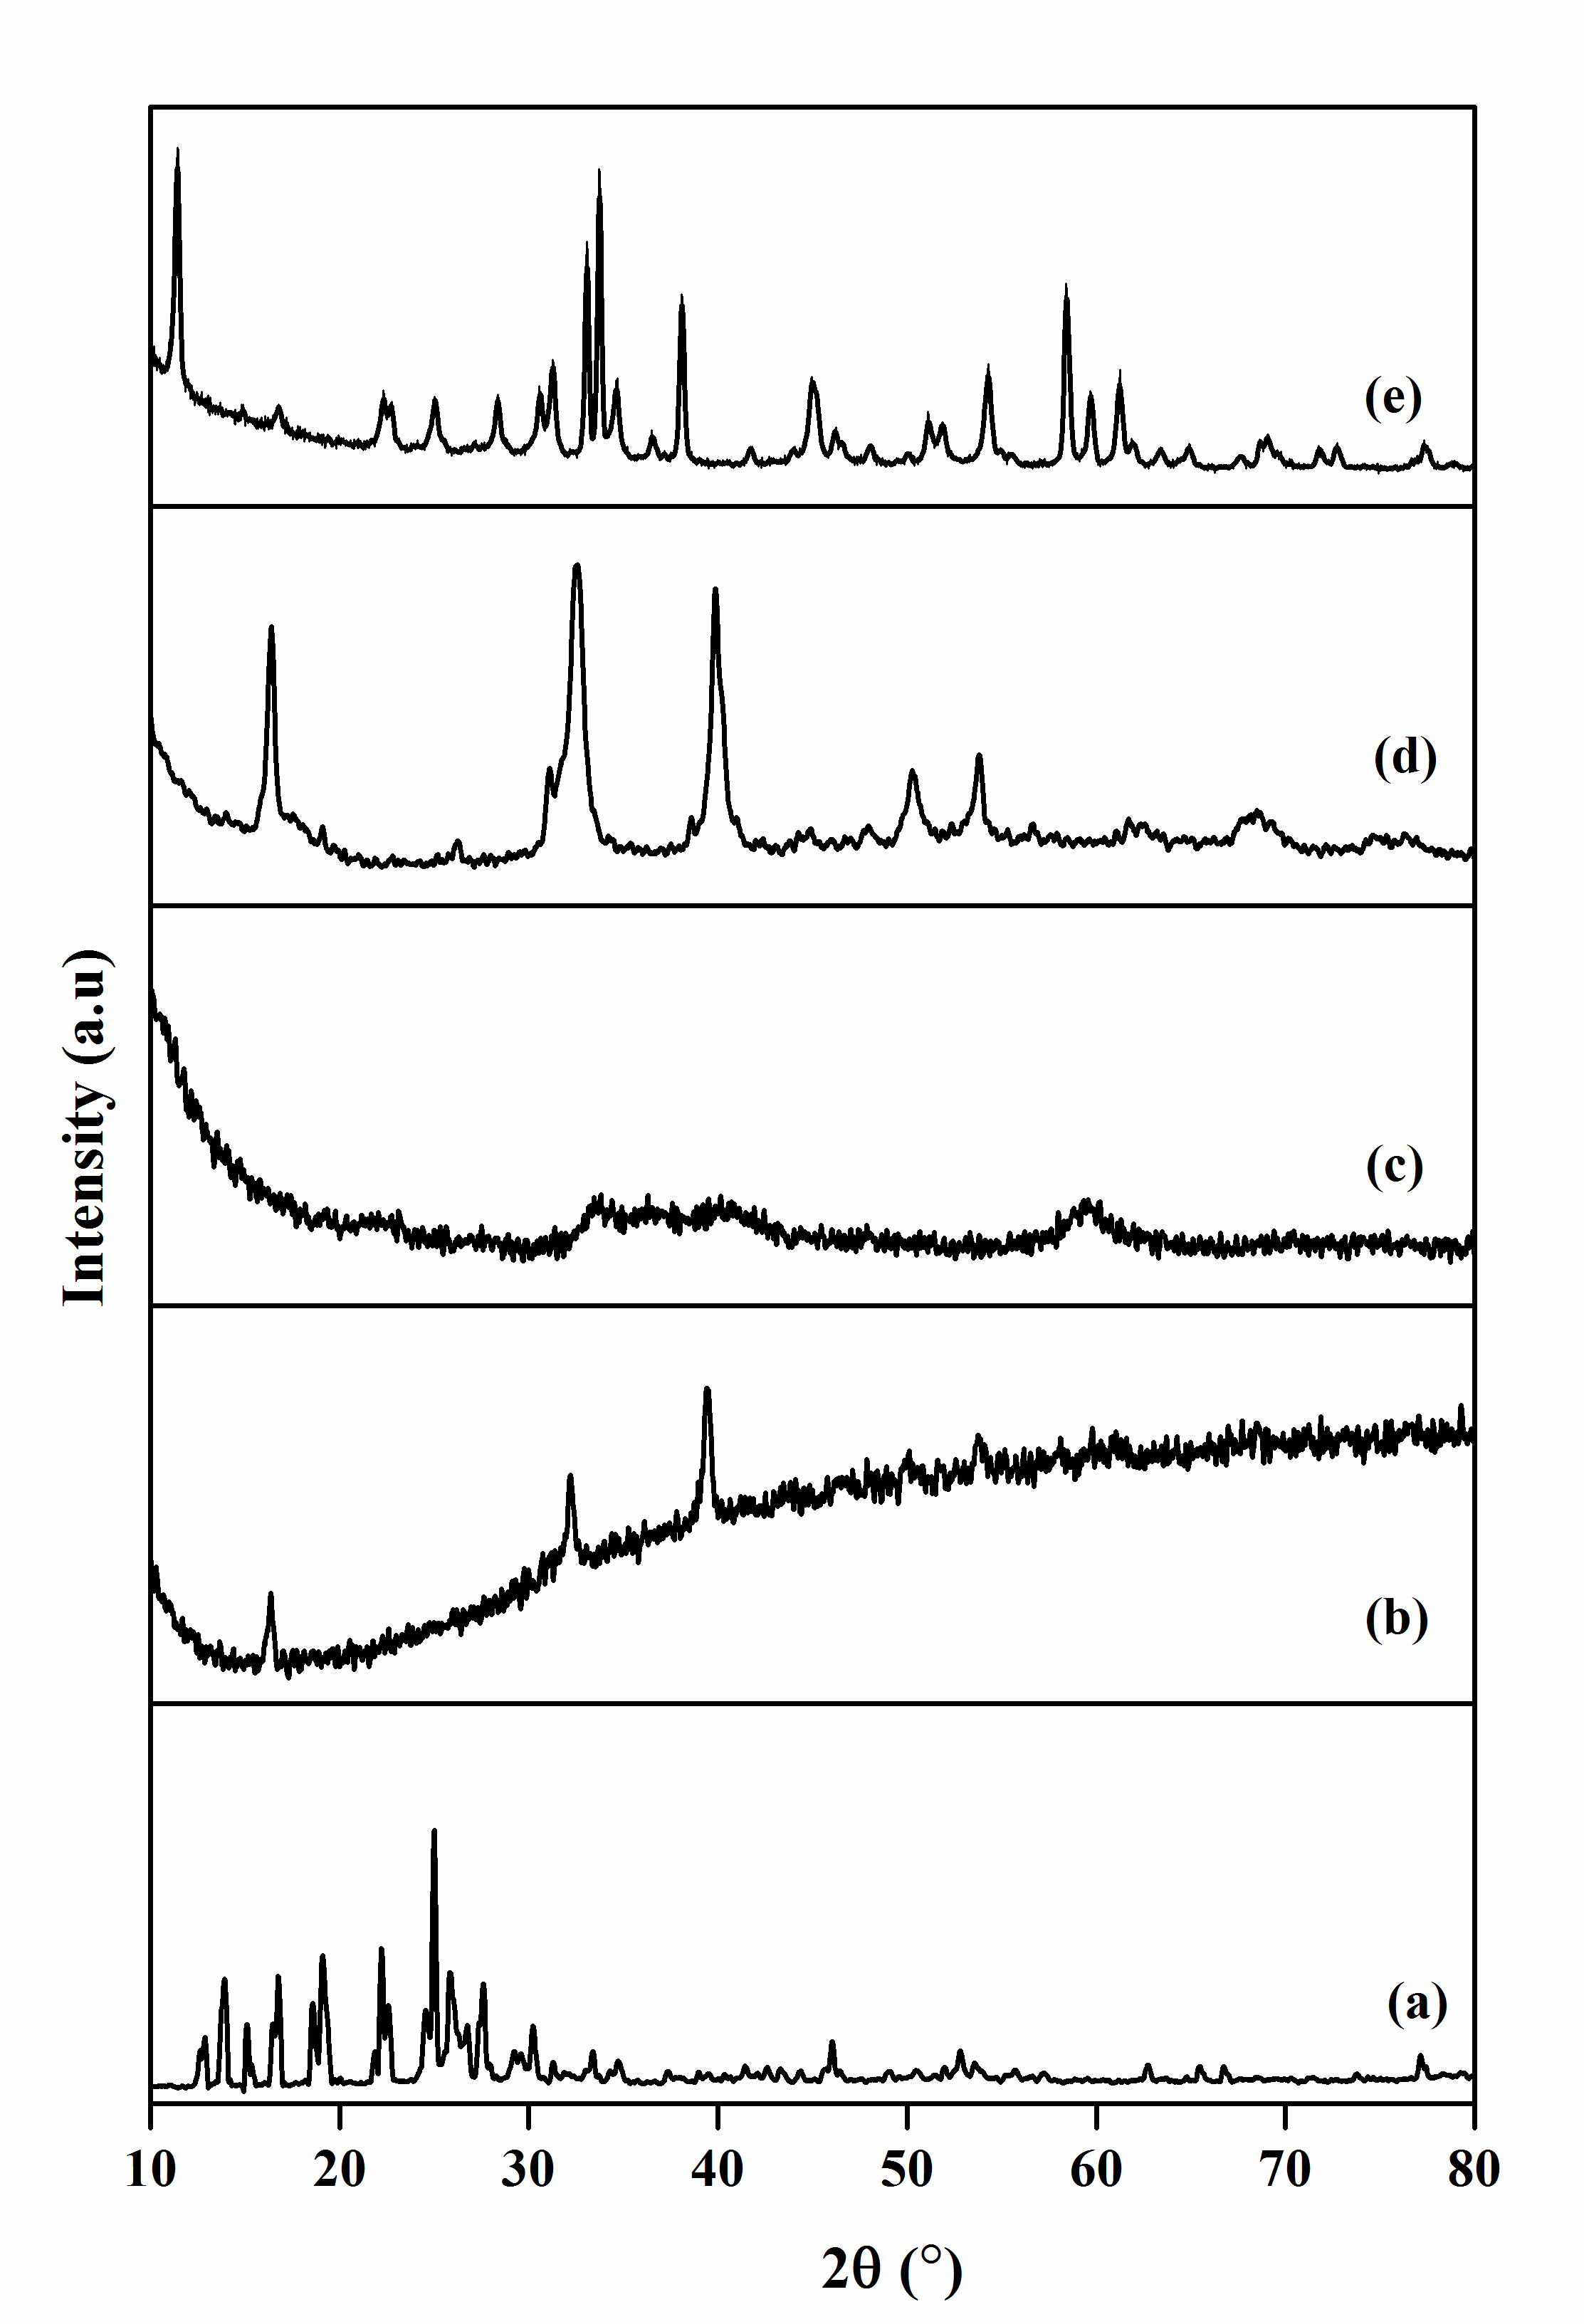


Figure S10. PXRD patterns of (a) ligand, (b) CoL2Cl2, (c) NiL2Cl2, (d) CuL2Cl2 and (e) ZnL2Cl2.


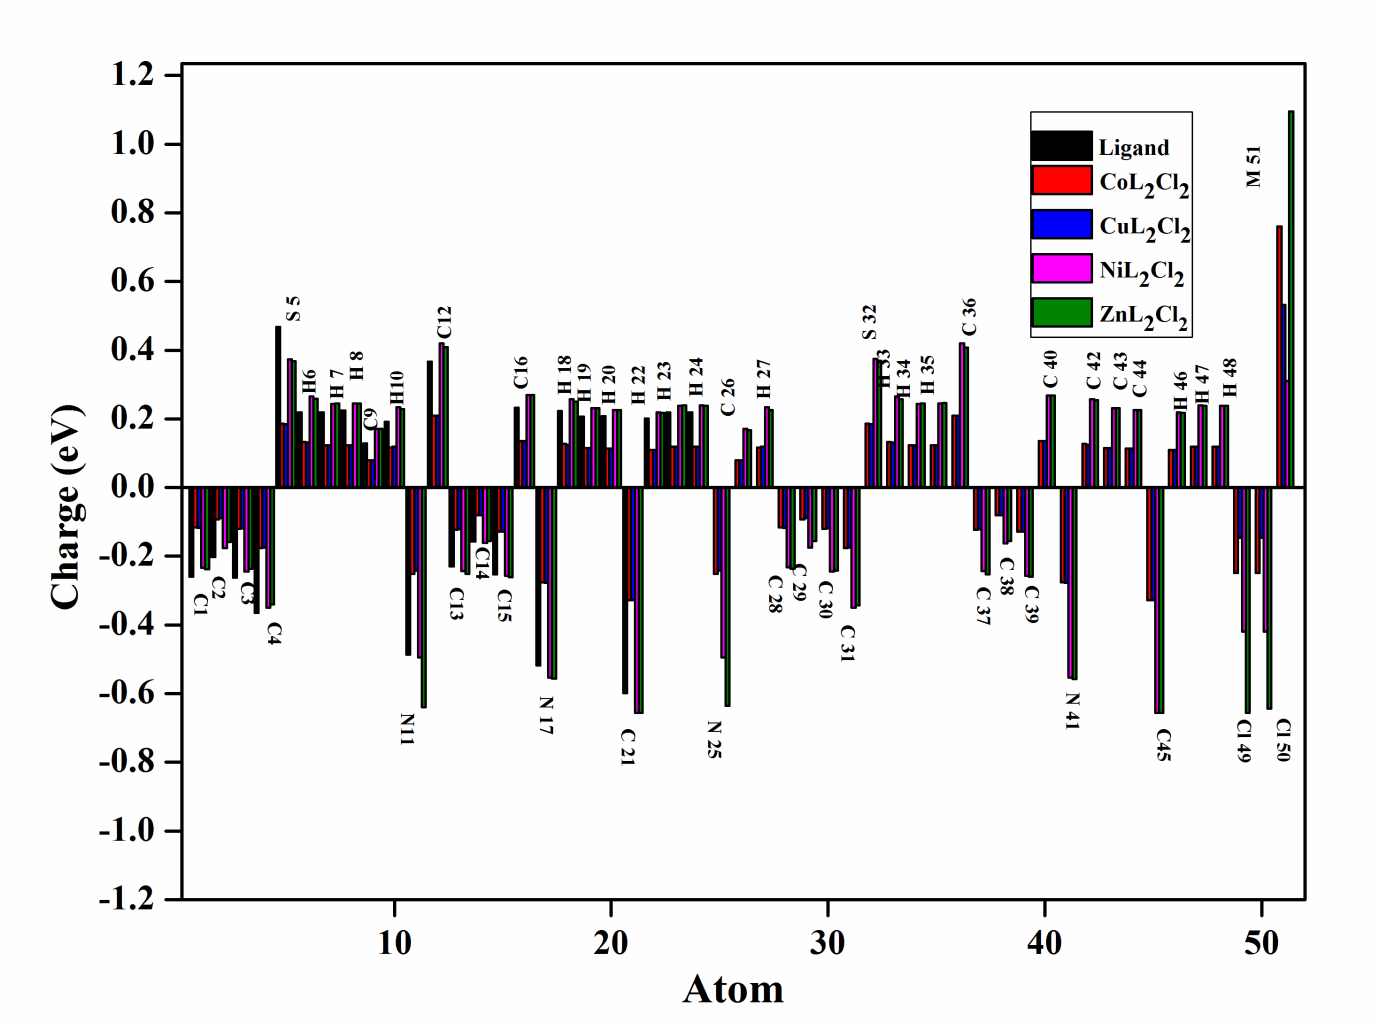


Figure S11. Plot of atomic charges of ligand and complexes.


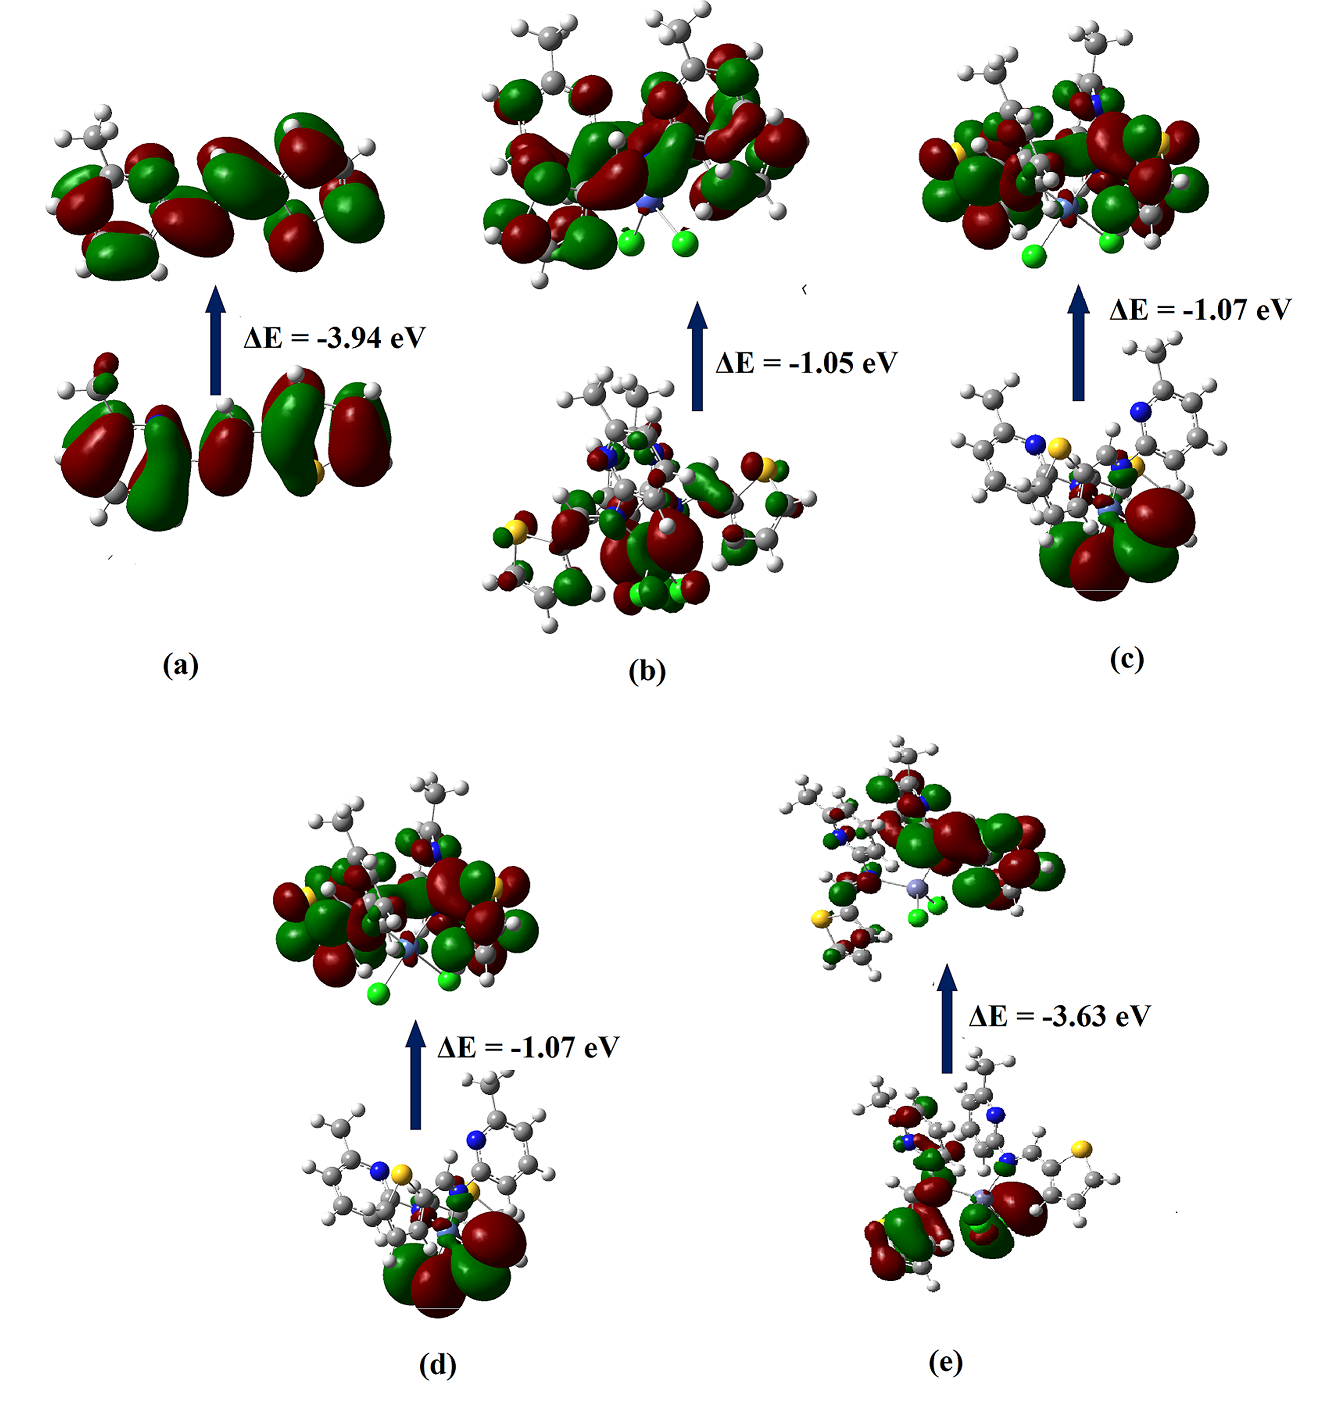


Figure S12. Graphic representation of HOMO and LUMO orbitals of (a) ligand, (b) CoL2Cl2, (c) NiL2Cl2, (d) CuL2Cl2 and (e) ZnL2Cl2.


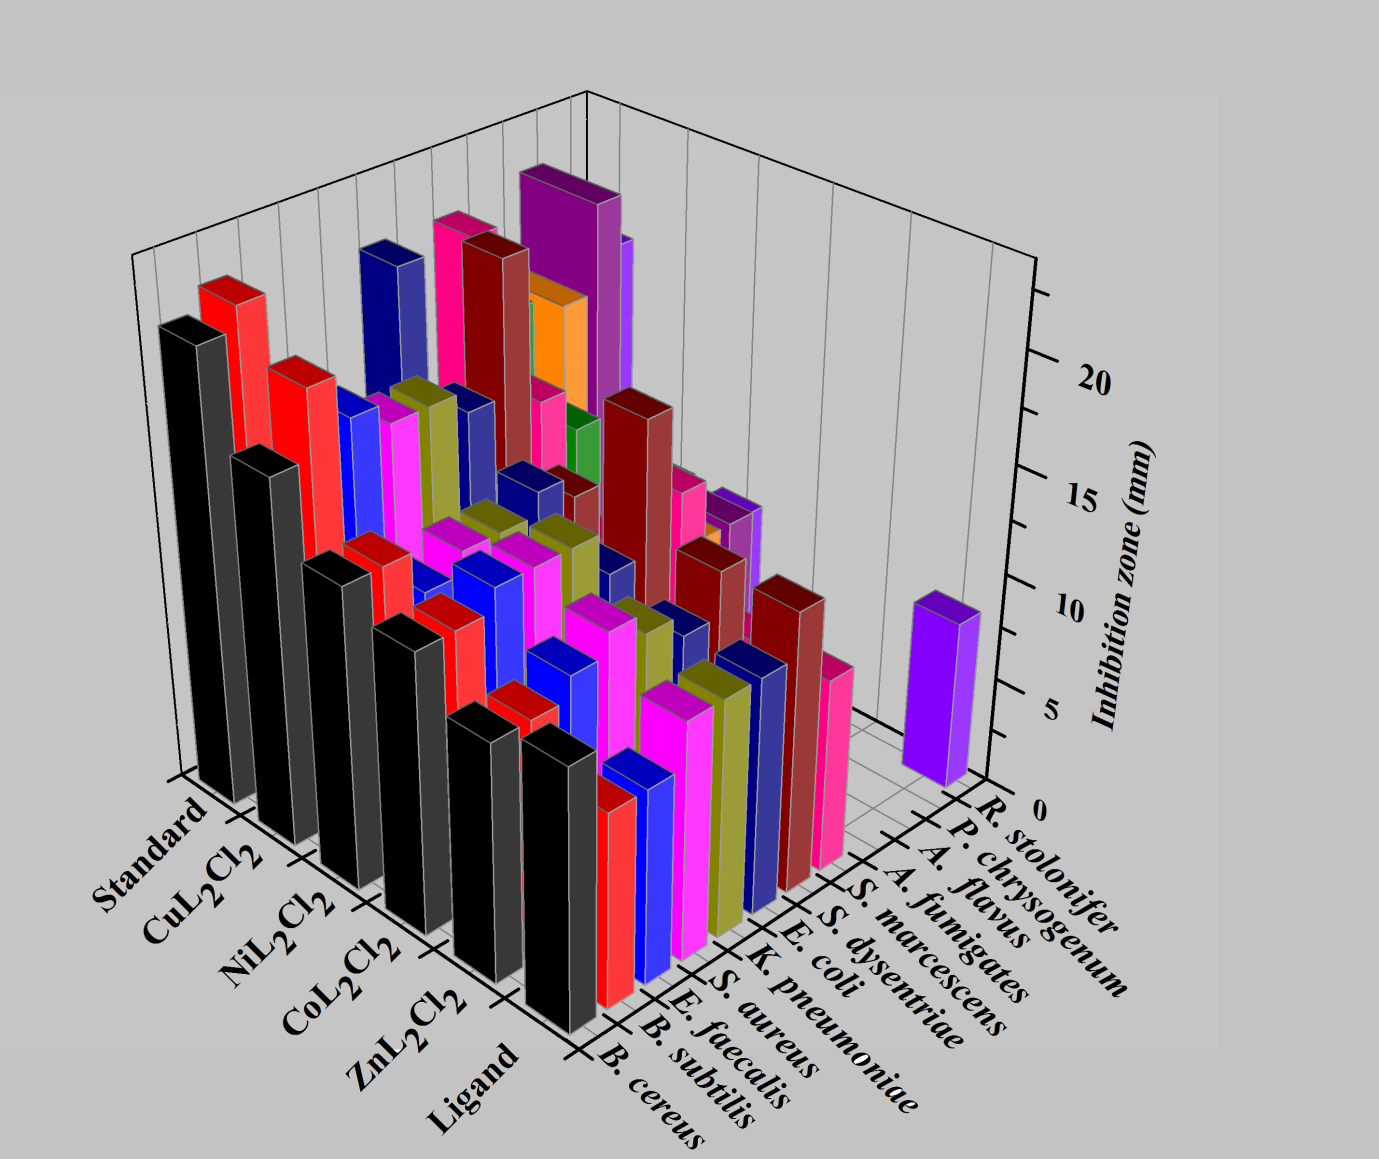


Figure S13. Antimicrobial activity of ligand and complexes.


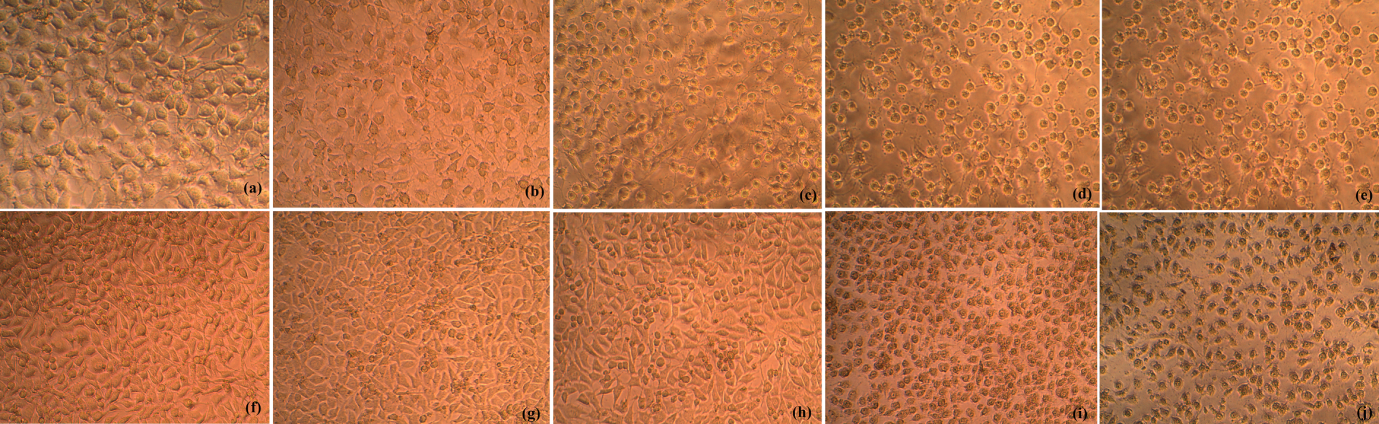


Figure S14. Morphological changes of L927 cells using (a - e) CoL2Cl2 and (f - j) CuL2Cl2 complexes by MTT assay.

Table S1. Percentage degradation of MB with time for ligand and complexes.

| Time (min.) | % Degradation | | | | |
| --- | --- | --- | --- | --- | --- |
| Ligand | CoL2Cl2 | NiL2Cl2 | CuL2Cl2 | ZnL2Cl2 |
| 30 | 29.00 | 25.00 | 17.00 | 21.20 | 26.00 |
| 60 | 64.40 | 83.07 | 72.56 | 80.44 | 88.80 |
| 90 | 63.20 | 70.87 | 87.70 | 64.40 | 68.60 |

Table S2. *In vitro* antimicrobial activities of ligand and complexes.

| Microbial species | | Zone of inhibition (mm) | | | | | Vanomycin / Clotrimazole |
| --- | --- | --- | --- | --- | --- | --- | --- |
| Ligand | CoL2Cl2 | NiL2Cl2 | CuL2Cl2 | ZnL2Cl2 |
| Antibacterial | *B. cereus* | 12 | 17 | 14 | 13 | 11 | 21 |
| *B. subtilis* | 9 | 20 | 14 | 13 | 11 | 22 |
| *E. faecalis* | 9 | 18 | 12 | 14 | 12 | 13 |
| *S. aureus* | 13 | 17 | 13 | 14 | 13 | 15 |
| *E. coli* | 11 | 17 | 13 | 14 | 12 | 13 |
| *K. pneumonia* | 11 | 16 | 14 | 12 | 11 | 21 |
| *S. dysentriae* | 13 | 22 | 13 | 18 | 13 | 13 |
| *S. marcescens* | 9 | 15 | 10 | 14 | 9 | 21 |
| Antifungal | *A. fumigates* | - | 13 | 10 | 9 | - | 17 |
| *A. flavus* | - | - | 9 | - | - | 17 |
| *P. chrysogenum* | - | - | 9 | - | - | 21 |
| *R. stolonifer* | 8 | 8 | 8 | - | - | 18 |

Table S3. Percentage cell viability at different concentrations of CoL2Cl2 and CuL2Cl2 complexes.

| Complexes | Concentration (µg/mL) | Average optical density | Cell viability (%) |
| --- | --- | --- | --- |
|  | control | 0.5242 | 100 |
| CoL2Cl2 | 6.25 | 0.3925 | 74.88 |
| 12.5 | 0.3567 | 68.05 |
| 25 | 0.3075 | 58.65 |
| 50 | 0.2519 | 48.06 |
| 100 | 0.1899 | 36.23 |
| CuL2Cl2 | 6.25 | 0.5106 | 97.40 |
| 12.5 | 0.4955 | 94.52 |
| 25 | 0.4255 | 81.17 |
| 50 | 0.1584 | 30.21 |
| 100 | 0.1284 | 24.49 |
